# Supplementary material for: Multi-scale molecular simulation of random peptide phase separation and its extended-to-compact structure transition driven by hydrophobic interactions
Source: Royal Society of Chemistry journal article supplement (doi:10.1039/d3sm00633f), 2023-01-01
Supplement: d3sm00633f1.pdf [file d3sm00633f1.pdf]

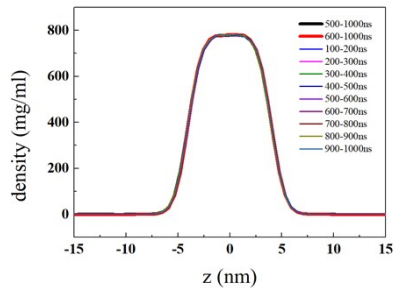

**Figure SI 1.** Convergence test: Here, the distribution curve of the density of high-density phase along the z-axis is given for the random polypeptide with  $H=0.96$  and the temperature of  $T=400\text{K}$ .

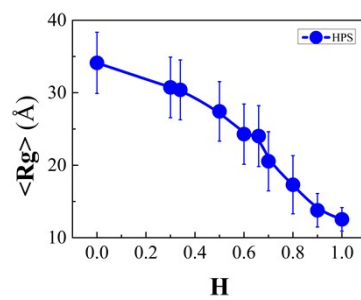

**Figure SI 2.** The total gyration radius  $R_g$  vs. the mean hydrophobicity for HPS model, the error bar represents the conformational fluctuation of the same trajectory after equilibrium.

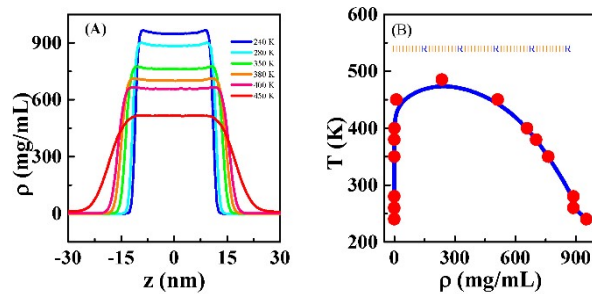

**Figure SI 3.** Phase separation of disordered random polypeptides S1 system: (A) density distribution curve along the z-axis at different temperatures; (B) Phase diagram of S1 obtained from the density profile (temperature, and density curve);

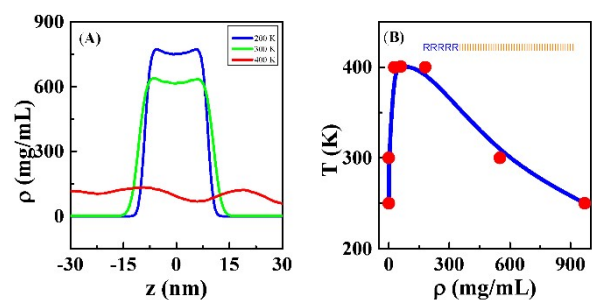

**Figure SI 4.** Phase separation of disordered random polypeptides S2 system: (A) density distribution

curve along the z-axis at different temperatures; (B) Phase diagram of S2 obtained from the density profile (temperature, and density curve).

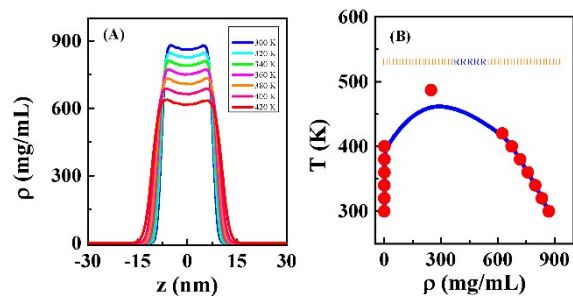

**Figure SI 5.** Phase separation of disordered random polypeptides S3 system: (A) density distribution curve along the z-axis at different temperatures; (B) Phase diagram of S3 obtained from the density profile (temperature, and density curve).

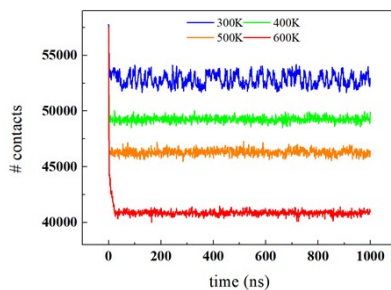

**Figure SI 6.** Evolution of the total contacts with simulation time at different temperatures for 200 chains  $I_{50}$  peptides.

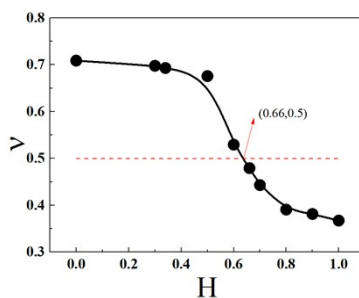

**Figure SI 7.** At 298 K, scaling exponent  $\nu$  fitting from all-atom REMC simulation

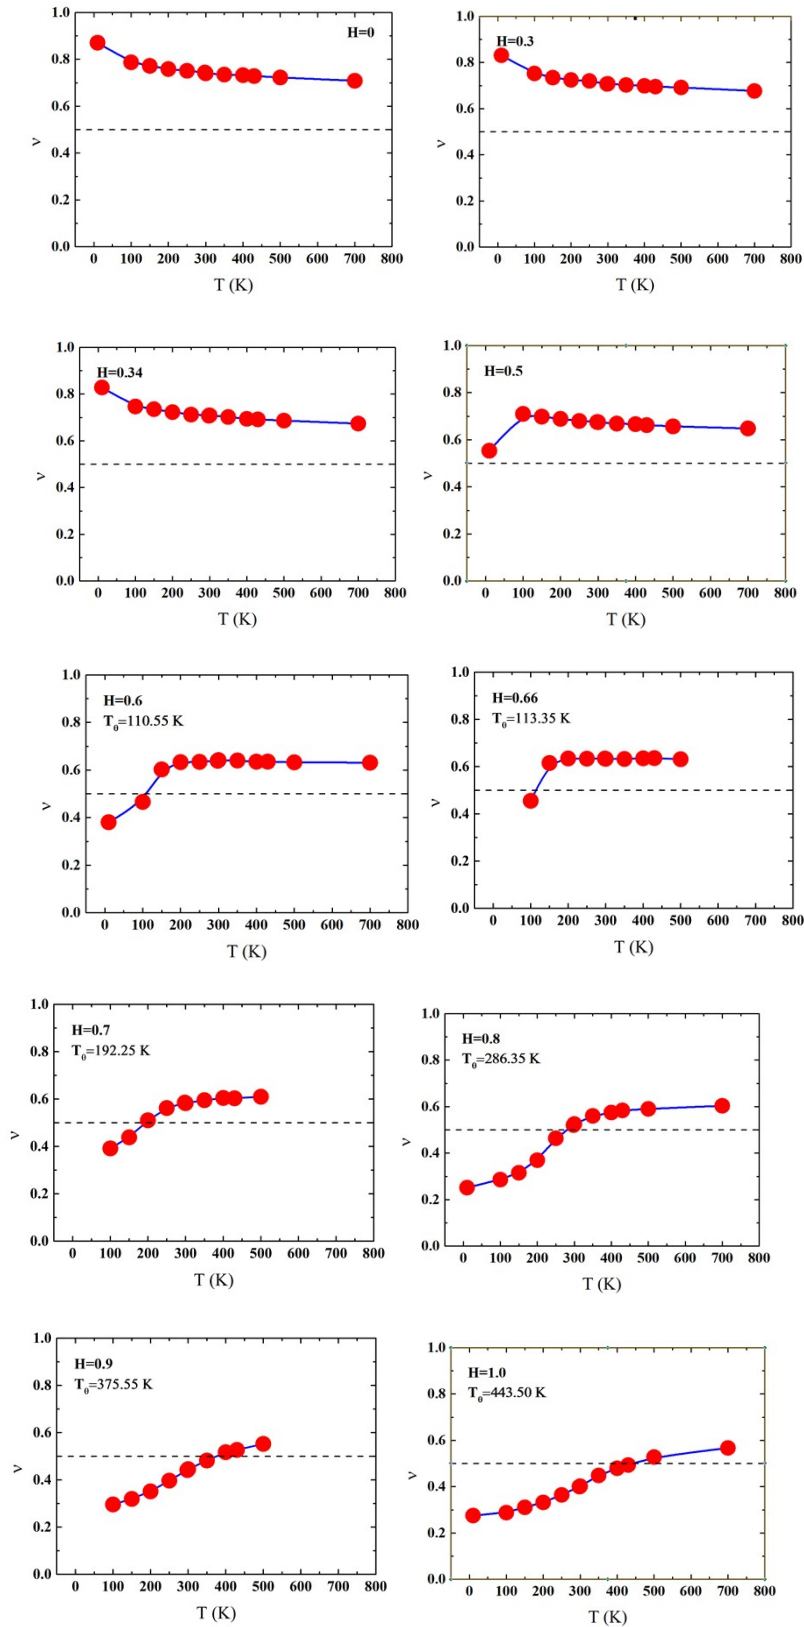

**Figure SI 8.** The relationship between the scaling exponent  $\nu$  and temperature  $T$  obtained by the simulation of random peptide coarsening is given, where  $T_0$  indicates the transition temperature from compact to extend of the system.
